# Supplementary material
Source: publisher figshare collection journal article supplement (https://acs.figshare.com/ndownloader/files/4099360)
Supplement: Supplementary file 1 [file 4099360]

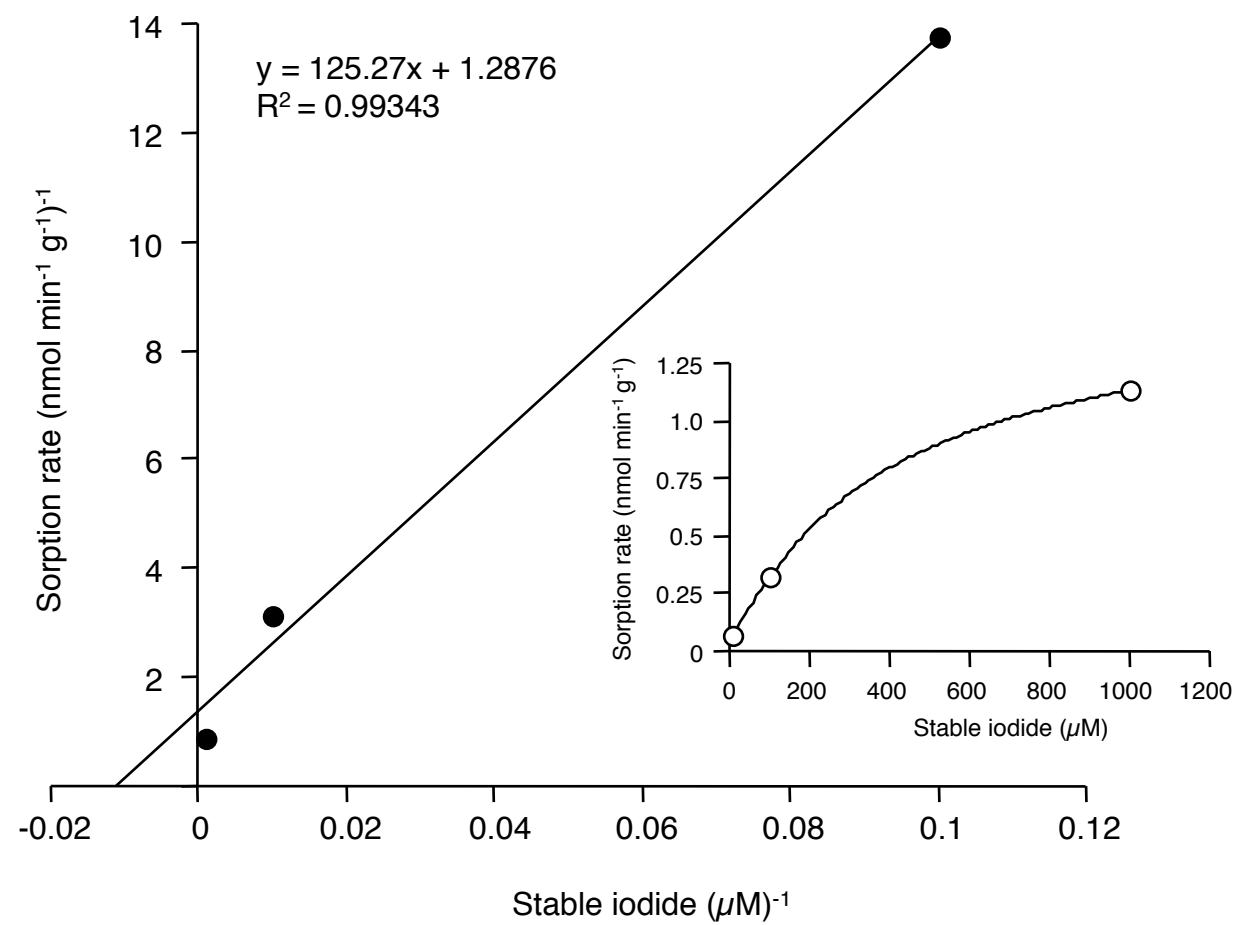

Fig. S1

**Figure S1.** Estimation of  $K_m$  value for iodide of native laccase in forest soil. Iodide sorption rates ( $\text{nmol min}^{-1} \text{g soil}^{-1}$ ) and their reciprocals are plotted against stable iodide concentrations ( $\mu\text{M}$ ) and their reciprocals. The sorption rates were calculated from the data plotted on Fig. 1C after the incubation of the slurry for 72 h. In the double reciprocal plot, an X-intercept represents  $-1/K_m$ . Thus,  $K_m$  was calculated to be  $97 \mu\text{M}$  from the equation described in the figure. Generally, 3 data points are not enough for  $K_m$  calculation, the estimated  $K_m$  value ( $97 \mu\text{M}$ ) is within the range of iodide concentrations (10 to  $1,000 \mu\text{M}$ ), where the 3 data points were obtained.

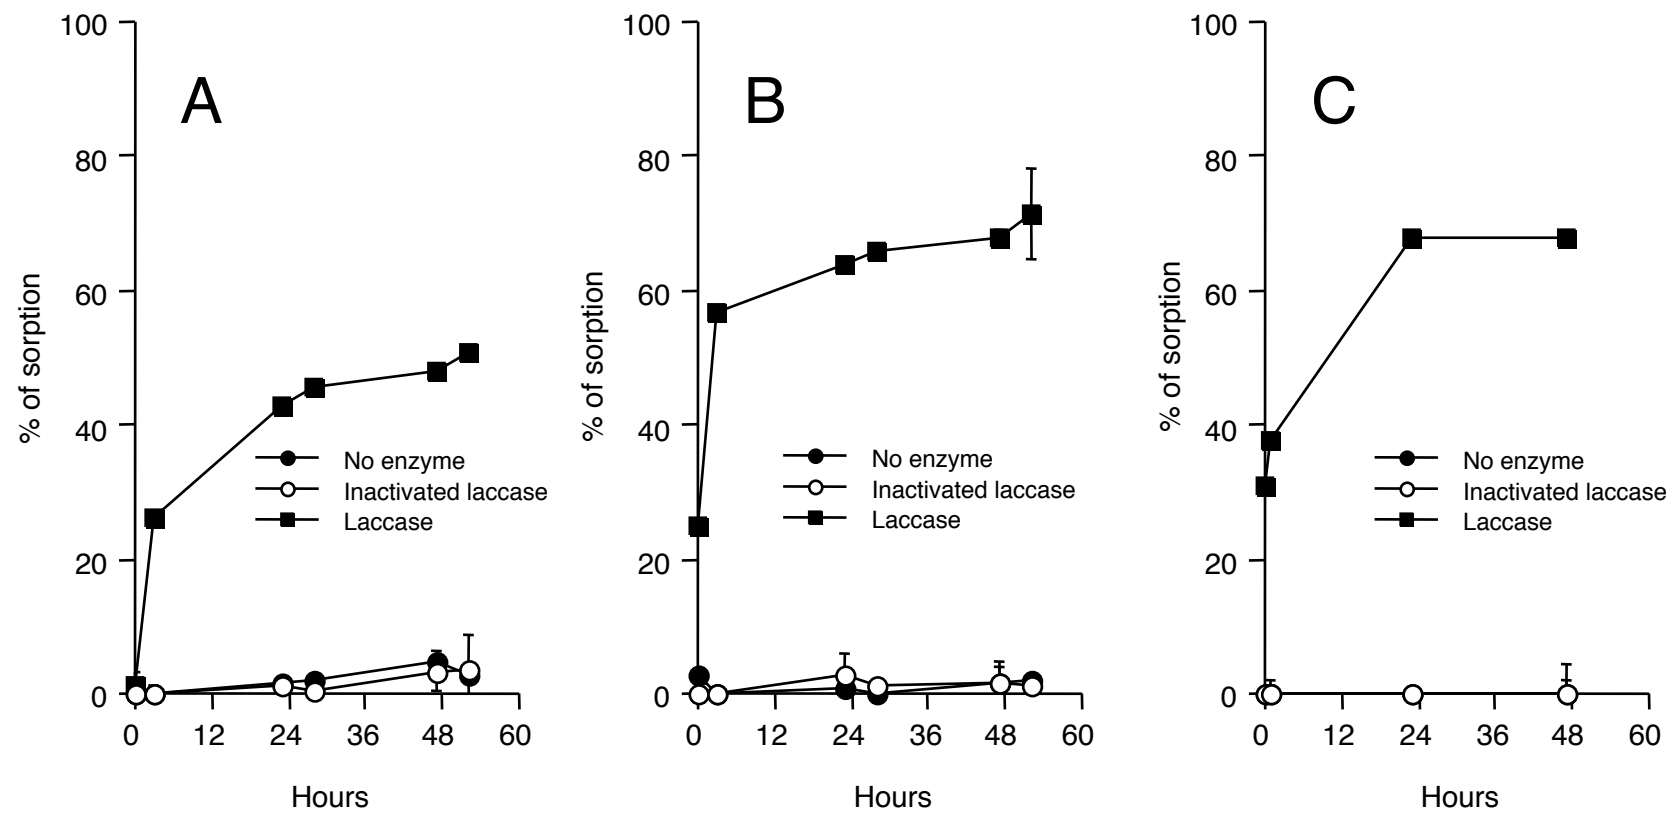

Fig. S2

**Figure S2.** Restoration of iodide sorption capacity of autoclaved forest soil by bacterial laccase in the presence of 10  $\mu\text{M}$  (A), 100  $\mu\text{M}$  (B), and 1 mM (C) stable iodide. One gram of forest soil was mixed with 10 mL distilled water, autoclaved, and supplemented with stable iodide (KI), 33 Bq of  $^{125}\text{I}^-$ , and 300 mU of bacterial laccase. Symbols represent the mean values obtained for triplicate determinations, and bars indicate standard deviations.
